# Supplementary material
Source: PubMed Central journal article supplement (PMC4524142)
Supplement: AEM.00149-15_zam999116307so1.pdf [file AEM.00149-15_zam999116307so1.pdf]

Table S1: Primers used for identification of *sus*, *dex* and *fruct* PULs by qPCR analysis

| Gene (PUL)              | Forward Primer (5'-3') | Reverse Primer (5'-3') |
|-------------------------|------------------------|------------------------|
| BT3090 ( <i>dex</i> )   | ATGCTGAATGCCGCCCAATA   | CGAGAAAACCGCCGGATACATA |
| BT3702 ( <i>sus</i> )   | GCTATTGGCGGGGCATTGG    | CAGCGGATTTGGGGAGAGTTCG |
| BT1763 ( <i>fruct</i> ) | ATGCCTGGTCACCTACGAAC   | CAAGCGGTCCATTCTCATTT   |
